# Supplementary material
Source: ML conference proceedings conference paper supplement (https://proceedings.neurips.cc/paper_files/paper/2013/hash/05311655a15b75fab86956663e1819cd-Abstract.html)
Supplement: Supplementary file [file 05311655a15b75fab86956663e1819cd-Supplemental.zip]

# On the Relationship Between Binary Classification, Bipartite Ranking, and Binary Class Probability Estimation

## Appendix

### A Proof of Theorem 4

*Proof.* Assume w.l.o.g. that  $\text{Thresh}_{D,f,c}(u) = \text{sign}(u - t^*)$  for some  $t^* \in [-\infty, \infty]$ ; a similar analysis can be shown when  $\text{Thresh}_{D,f,c}(u) = \overline{\text{sign}}(u - t^*)$  for some  $t^*$ . We first recall the following result of Cl  men  on et al. [8] (adapted as in [26] to account for ties and conditioning on  $y \neq y'$ ).

$$\begin{aligned} \text{regret}_D^{\text{rank}}[f] &= \frac{1}{2p(1-p)} \mathbf{E}_{x,x'} \left[ |\eta(x) - \eta(x')| \left( \mathbf{1}((f(x) - f(x'))(\eta(x) - \eta(x')) < 0) \right. \right. \\ &\quad \left. \left. + \frac{1}{2} \mathbf{1}(f(x) = f(x')) \right) \right]. \end{aligned}$$

Next, given a binary classifier  $h : X \rightarrow \{\pm 1\}$  and a cost parameter  $c \in (0, 1)$ , the cost-sensitive classification error can be rewritten as

$$\text{er}_D^{0-1,c}[h] = \mathbf{E}_x [(1-c)\eta(x)\mathbf{1}(h(x) = -1) + c(1-\eta(x))\mathbf{1}(h(x) = 1)]$$

and the corresponding regret can be expanded as

$$\begin{aligned} \text{regret}_D^{0-1,c}[h] &= \mathbf{E}_x [(1-c)\eta(x)\mathbf{1}(h(x) = -1) + c(1-\eta(x))\mathbf{1}(h(x) = 1)] \\ &\quad - \mathbf{E}_x [(1-c)\eta(x)\mathbf{1}(\eta(x) \leq c) + c(1-\eta(x))\mathbf{1}(\eta(x) > c)] \\ &= \mathbf{E}_x [(c - \eta(x))\mathbf{1}(h(x) = 1, \eta(x) \leq c)] + \mathbf{E}_x [(\eta(x) - c)\mathbf{1}(h(x) = -1, \eta(x) > c)]. \end{aligned}$$

For  $h = \text{sign} \circ (f - t^*)$ ,

$$\begin{aligned} \text{regret}_D^{0-1,c}[\text{sign} \circ (f - t^*)] &= \mathbf{E}_x [(c - \eta(x))\mathbf{1}(f(x) > t^*, \eta(x) \leq c)] + \mathbf{E}_x [(\eta(x) - c)\mathbf{1}(f(x) \leq t^*, \eta(x) > c)] \quad (1) \\ &= a + b \text{ (say)}. \end{aligned}$$

We then have

$$\begin{aligned} 2p(1-p) \text{regret}_D^{\text{rank}}[f] &\geq \frac{1}{2} \mathbf{E}_{x,x'} \left[ |\eta(x) - \eta(x')| \left( \mathbf{1}((f(x) - f(x'))(\eta(x) - \eta(x')) \leq 0) \right) \right] \\ &\quad \text{(getting rid of the term accounting for ties)} \\ &\geq \frac{1}{2} \mathbf{E}_{x,x'} \left[ |\eta(x) - \eta(x')| \left( \mathbf{1}(f(x) \geq f(x'), \eta(x) \leq c, \eta(x') > c) \right. \right. \\ &\quad \left. \left. + \mathbf{1}(f(x) \leq f(x'), \eta(x) > c, \eta(x') \leq c) \right) \right] \\ &= \frac{2}{2} \mathbf{E}_{x,x'} \left[ |\eta(x) - \eta(x')| \left( \mathbf{1}(f(x) \geq f(x'), \eta(x) \leq c, \eta(x') > c) \right) \right] \\ &= \text{term}_1 + \text{term}_2 + \text{term}_3, \quad (2) \end{aligned}$$

where

$$\begin{aligned} \text{term}_1 &= \mathbf{E}_{x,x'} \left[ |\eta(x) - \eta(x')| \left( \mathbf{1}(f(x) \geq f(x') > t^*, \eta(x) \leq c, \eta(x') > c) \right) \right], \\ \text{term}_2 &= \mathbf{E}_{x,x'} \left[ |\eta(x) - \eta(x')| \left( \mathbf{1}(t^* \geq f(x) \geq f(x'), \eta(x) \leq c, \eta(x') > c) \right) \right] \text{ and} \\ \text{term}_3 &= \mathbf{E}_{x,x'} \left[ |\eta(x) - \eta(x')| \left( \mathbf{1}(f(x) > t^*, f(x') \leq t^*, \eta(x) \leq c, \eta(x') > c) \right) \right]. \end{aligned}$$

Each of the above terms corresponds to different sets of pairs of instances;  $\text{term}_1$  corresponds to pairs where both instances are ranked by  $f$  above  $t^*$ ;  $\text{term}_2$  corresponds to pairs where both instances are

ranked by  $f$  below (or at the same position as)  $t^*$ ;  $\text{term}_3$  corresponds to pairs  $(x, x')$ , where  $x$  is ranked by  $f$  above  $t^*$ , while  $x'$  is ranked below (or at the same position as)  $t^*$ . We next bound each of these terms separately.

$\text{term}_1$

$$\begin{aligned}
&= \mathbf{E}_{x,x'} \left[ |\eta(x') - c + c - \eta(x)| \left( \mathbf{1}(f(x) \geq f(x') > t^*, \eta(x) \leq c, \eta(x') > c) \right) \right] \\
&\geq \mathbf{E}_{x,x'} \left[ 2|\eta(x') - c| |c - \eta(x)| \left( \mathbf{1}(f(x) \geq f(x') > t^*, \eta(x) \leq c, \eta(x') > c) \right) \right] \\
&\quad \text{(since } u + v \geq 2\sqrt{uv} \geq 2uv, \forall u, v \in [0, 1]) \\
&= 2\mathbf{E}_x \left[ |c - \eta(x)| \mathbf{1}(f(x) > t^*, \eta(x) \leq c) \mathbf{E}_{x'} \left[ |\eta(x') - c| \mathbf{1}(t^* < f(x') \leq f(x), \eta(x') > c) \right] \right]. \tag{3}
\end{aligned}$$

By definition,  $t^*$  yields the minimum classification regret among all choices of thresholds  $t \in \mathbb{R}$ :

$$\begin{aligned}
t^* &= \underset{t \in [-\infty, \infty]}{\operatorname{argmin}} \left\{ \operatorname{regret}_D^{0.1,c} [\operatorname{sign} \circ (f - t)] \right\} \\
&= \underset{t \in [-\infty, \infty]}{\operatorname{argmin}} \mathbf{E}_{x'} \left[ (\eta(x') - c) \mathbf{1}(f(x') \leq t, \eta(x') > c) + (c - \eta(x')) \mathbf{1}(f(x') > t, \eta(x') \leq c) \right] \\
&\quad \text{(from Eq. (1)).}
\end{aligned}$$

It can hence be shown that for any  $t > t^*$ ,

$$\mathbf{E}_{x'} \left[ |\eta(x') - c| \mathbf{1}(t^* < f(x') \leq t, \eta(x') > c) \right] \geq \mathbf{E}_{x'} \left[ |c - \eta(x')| \mathbf{1}(t^* < f(x') \leq t, \eta(x') \leq c) \right].$$

Applying the above inequality to Eq. (3) with  $t = f(x)$ , we have

$\text{term}_1$

$$\begin{aligned}
&\geq 2\mathbf{E}_x \left[ |c - \eta(x)| \mathbf{1}(f(x) > t^*, \eta(x) \leq c) \mathbf{E}_{x'} \left[ |c - \eta(x')| \mathbf{1}(t^* < f(x') \leq f(x), \eta(x') \leq c) \right] \right] \\
&\geq \frac{2}{2} \mathbf{E}_x \left[ |c - \eta(x)| \mathbf{1}(f(x) > t^*, \eta(x) \leq c) \mathbf{E}_{x'} \left[ |c - \eta(x')| \mathbf{1}(t^* < f(x'), \eta(x') \leq c) \right] \right] \\
&\quad \text{(since } \mathbf{E}_{x,x'} [g(x, x') \mathbf{1}(f(x) \leq f(x'))] \geq \frac{1}{2} \mathbf{E}_{x,x'} [g(x, x')]) \\
&= \mathbf{E}_x \left[ |c - \eta(x)| \mathbf{1}(f(x) > t^*, \eta(x) \leq c) \right] \mathbf{E}_{x'} \left[ |c - \eta(x')| \mathbf{1}(t^* < f(x'), \eta(x') \leq c) \right] \\
&= \mathbf{E}_x \left[ |c - \eta(x)| \mathbf{1}(f(x) > t^*, \eta(x) \leq c) \right]^2 \\
&= a^2.
\end{aligned}$$

Similarly, one can show

$$\text{term}_2 \geq \mathbf{E}_x \left[ |\eta(x) - c| \mathbf{1}(f(x) \leq t^*, \eta(x) > c) \right]^2 = b^2.$$

In the case of  $\text{term}_3$ , we have

$$\begin{aligned}
\text{term}_3 &= \mathbf{E}_{x,x'} \left[ |\eta(x') - c + c - \eta(x)| \left( \mathbf{1}(f(x) > t^*, f(x') \leq t^*, \eta(x) \leq c, \eta(x') > c) \right) \right] \\
&\geq \mathbf{E}_{x,x'} \left[ 2|\eta(x') - c| |c - \eta(x)| \left( \mathbf{1}(f(x) > t^*, f(x') \leq t^*, \eta(x) \leq c, \eta(x') > c) \right) \right] \\
&\quad \text{(since } u + v \geq 2\sqrt{uv} \geq 2uv, \forall u, v \in [0, 1]) \\
&\geq 2\mathbf{E}_{x,x'} \left[ |c - \eta(x)| \mathbf{1}(f(x) > t^*, \eta(x) \leq c) |\eta(x') - c| \mathbf{1}(f(x') \leq t^*, \eta(x') > c) \right] \\
&= 2\mathbf{E}_x \left[ |c - \eta(x)| \mathbf{1}(f(x) > t^*, \eta(x) \leq c) \right] \mathbf{E}_{x'} \left[ |\eta(x') - c| \mathbf{1}(f(x') \leq t^*, \eta(x') > c) \right] \\
&= 2ab.
\end{aligned}$$

Applying the bounds on  $\text{term}_1$ ,  $\text{term}_2$  and  $\text{term}_3$  in Eq. (2), we have

$$\begin{aligned}
2p(1-p) \operatorname{regret}_D^{\operatorname{rank}}[f] &\geq a^2 + b^2 + 2ab \\
&= (a + b)^2 \\
&= (\operatorname{regret}_D^{0.1,c} [\operatorname{sign} \circ (f - t^*)])^2.
\end{aligned}$$

Hence the proof.  $\square$

## B Proof of Theorem 6

*Proof.*

$$\begin{aligned}
& \text{regret}_D^{0-1,c}[\text{sign} \circ (f - \hat{t}_{S,f,c})] \\
&= \text{er}_D^{0-1,c}[\text{sign} \circ (f - \hat{t}_{S,f,c})] - \text{er}_D^{0-1,c,*} \\
&= \text{er}_D^{0-1,c}[\text{sign} \circ (f - \hat{t}_{S,f,c})] - \text{er}_D^{0-1,c}[\text{Thresh}_{D,f,c} \circ f] + \text{er}_D^{0-1,c}[\text{Thresh}_{D,f,c} \circ f] - \text{er}_D^{0-1,c,*} \\
&\quad \text{(where } \text{Thresh}_{D,f,c} \text{ is obtained from (OP1))} \\
&= \left( \text{er}_D^{0-1,c}[\text{sign} \circ (f - \hat{t}_{S,f,c})] - \text{er}_D^{0-1,c}[\text{Thresh}_{D,f,c} \circ f] \right) + \text{regret}_D^{0-1,c}[\text{Thresh}_{D,f,c} \circ f].
\end{aligned} \tag{4}$$

The second term in the above expression can be upper bounded in terms of the ranking regret of  $f$  using Theorem 4. We now derive a bound on the first term by using standard VC-dimension based uniform convergence result for binary classification. Note that the real-valued function  $f$ , when applied to each instance drawn from  $D$ , induces a distribution over  $\mathbb{R} \times \{\pm 1\}$ ; let us call this distribution  $D_f$ . Also, let  $S_f = \{(f(x_1), y_1), \dots, (f(x_n), y_n)\}$  be the set constructed by applying  $f$  to each instance in  $S$ ; given that  $S$  is drawn iid from  $D$ , it follows that  $S_f$  is also iid drawn from  $D_f$ . Recall that  $\mathcal{T}_{\text{inc}}$  is the set of all increasing functions from  $\mathbb{R}$  to  $\{\pm 1\}$  (see Section 3). One can now view the optimization problem in (OP1) as risk minimization over  $\mathcal{T}_{\text{inc}}$  w.r.t. the distribution  $D_f$  and the optimization problem in (OP2) as empirical risk minimization over  $\mathcal{T}_{\text{inc}}$  w.r.t. the training sample  $S_f$ . In other words,

$$\inf_{\theta \in \mathcal{T}_{\text{inc}}} \left\{ \text{er}_D^{0-1,c}[\theta \circ f] \right\} = \inf_{\theta \in \mathcal{T}_{\text{inc}}} \left\{ \text{er}_{D_f}^{0-1,c}[\theta] \right\} = \text{er}_{D_f}^{0-1,c}[\theta^*]$$

and

$$\inf_{t \in \mathbb{R}} \left\{ \text{er}_S^{0-1,c}[\text{sign} \circ (f - t)] \right\} = \inf_{\theta \in \mathcal{T}_{\text{inc}}} \left\{ \text{er}_{S_f}^{0-1,c}[\theta] \right\} = \text{er}_{S_f}^{0-1,c}[\hat{\theta}].$$

Thus the first term in Eq. (4) evaluates to  $\text{er}_{D_f}^{0-1,c}[\hat{\theta}] - \text{er}_{D_f}^{0-1,c}[\theta^*]$ . Using standard results, one can show that the following upper bound on this quantity holds with probability at least  $1 - \delta$  (over the draw of  $S \sim D^n$ ):

$$\text{er}_{D_f}^{0-1,c}[\hat{\theta}] - \text{er}_{D_f}^{0-1,c}[\theta^*] \leq \sqrt{\frac{32(\text{VC-dim}(\mathcal{T}_{\text{inc}})(\ln(2n) + 1) + \ln(\frac{4}{\delta}))}{n}},$$

where  $\text{VC-dim}(\mathcal{T}_{\text{inc}})$  is the VC dimension of  $\mathcal{T}_{\text{inc}}$ . Thus with probability at least  $1 - \delta$  (over the draw of  $S \sim D^n$ ), we have

$$\begin{aligned}
& \text{regret}_D^{0-1,c}[\text{sign} \circ (f - \hat{t}_{S,f,c})] \\
& \leq \sqrt{\frac{32(\text{VC-dim}(\mathcal{T}_{\text{inc}})(\ln(2n) + 1) + \ln(\frac{4}{\delta}))}{n}} + \sqrt{2} \sqrt{p(1-p) \text{regret}_D^{\text{rank}}[f]}.
\end{aligned}$$

It is easy to see that  $\text{VC-dim}(\mathcal{T}_{\text{inc}}) = 2$ ; plugging this in the above expression completes the proof.  $\square$

## C Proof of Theorem 10

Our proof for Theorem 10 is simpler than the one in [20] which holds for a more general result. We first state and prove two lemmas which will be useful in our proof.

**Lemma 20.** *Let  $D$  be a distribution over  $X \times \{\pm 1\}$ . For any binary class probability estimator  $\hat{\eta} : X \rightarrow [0, 1]$  calibrated w.r.t.  $D$  and threshold  $t \in [0, 1]$ ,*

$$\text{er}_D^{0-1,c}[\text{sign} \circ (\hat{\eta} - t)] = \mathbf{E}_{s_{\hat{\eta}}}[(1-c)s_{\hat{\eta}}\mathbf{1}(s_{\hat{\eta}} \leq t) + c(1-s_{\hat{\eta}})\mathbf{1}(s_{\hat{\eta}} > t)]$$

and

$$\text{er}_D^{0-1,c}[\overline{\text{sign}} \circ (\hat{\eta} - t)] = \mathbf{E}_{s_{\hat{\eta}}}[(1-c)s_{\hat{\eta}}\mathbf{1}(s_{\hat{\eta}} < t) + c(1-s_{\hat{\eta}})\mathbf{1}(s_{\hat{\eta}} \geq t)],$$

where  $s_{\hat{\eta}}$  is the random variable associated with the score distribution of  $\hat{\eta}$  over  $[0, 1]$ .

*Proof.* We give a proof for the first part of the result; the second part involving  $\overline{\text{sign}}$  can be proved in a similar manner. For simplicity of notation, we omit the subscript on  $s_{\hat{\eta}}$ . For any  $c \in (0, 1)$ , we have

$$\begin{aligned}
& \text{er}_D^{0-1,c}[\text{sign} \circ (\hat{\eta} - t)] \\
&= \mathbf{E}_x[(1-c)\eta(x)\mathbf{1}(\hat{\eta}(x) \leq t) + c(1-\eta(x))\mathbf{1}(\hat{\eta}(x) > t)] \\
&= \mathbf{E}_s[\mathbf{E}_x[(1-c)\eta(x)\mathbf{1}(\hat{\eta}(x) \leq t) + c(1-\eta(x))\mathbf{1}(\hat{\eta}(x) > t) \mid \hat{\eta}(x) = s]] \\
&= \mathbf{E}_s[(1-c)\mathbf{E}_x[\eta(x) \mid \hat{\eta}(x) = s]\mathbf{1}(s \leq t) + c(1-\mathbf{E}_x[\eta(x) \mid \hat{\eta}(x) = s])\mathbf{1}(s > t)] \\
&= \mathbf{E}_s[(1-c)\mathbf{P}(y=1|s)\mathbf{1}(s \leq t) + c(1-\mathbf{P}(y=1|s))\mathbf{1}(s > t)] \\
&\quad \text{(follows from } \mathbf{E}_x[\eta(x) \mid \hat{\eta}(x) = s] = \mathbf{P}(y=1|s)\text{)}.
\end{aligned}$$

□

The next lemma states that for any binary class probability estimator  $\hat{\eta}$  calibrated w.r.t.  $D$  and a given cost parameter  $c \in (0, 1)$ , the optimal classification transform on  $\hat{\eta}$  that yields minimum cost-sensitive classification error is simply  $\theta(u) = \text{sign}(u - c)$ .

**Lemma 21.** *Let  $D$  be a distribution over  $X \times \{\pm 1\}$ . For any binary class probability estimator  $\hat{\eta} : X \rightarrow [0, 1]$  calibrated w.r.t.  $D$  and cost parameter  $c \in (0, 1)$ ,*

$$\text{Thresh}_{D,\hat{\eta},c} = \text{sign} \circ (\hat{\eta} - c).$$

*Proof.* Let  $s_{\hat{\eta}}$  denote the random variable associated with the score distribution of  $\hat{\eta}$  over  $[0, 1]$ ; for simplicity of notation, we omit the subscript on  $s_{\hat{\eta}}$ . Let us start by considering functions  $\theta \in T_{\text{inc}}$  of the form  $\theta(u) = \text{sign}(u - t)$  for some  $t \in [0, 1]$ . For any  $c \in (0, 1)$ , we have

$$\begin{aligned}
& \text{argmin}_{t \in [0,1]} \left\{ \text{er}_D^{0-1,c}[\text{sign} \circ (\hat{\eta} - t)] \right\} \\
&= \text{argmin}_{t \in [0,1]} \left\{ \mathbf{E}_s \left[ \underbrace{(1-c)s\mathbf{1}(s \leq t) + c(1-s)\mathbf{1}(s > t)}_{\text{minimum at } t=c} \right] \right\} \quad \text{(from Lemma 20)} \\
&= c.
\end{aligned}$$

The last step follows from the fact that the point-wise minimum is attained at  $t = c$ ; this implies that  $\theta(u) = \text{sign}(u - c)$  yields the least possible value of  $\text{er}_D^{0-1,c}[\theta \circ \hat{\eta}]$  over all increasing functions in  $\mathcal{T}_{\text{inc}}$ , and hence we have  $\text{Thresh}_{D,\hat{\eta},c} = \text{sign} \circ (\hat{\eta} - c)$ . □

We are now ready to prove Theorem 10. As before, let  $s_{\hat{\eta}}$  denote the random variable associated with the score distribution of  $\hat{\eta}$  over  $[0, 1]$ ; for simplicity of notation, let us omit the subscript on  $s_{\hat{\eta}}$ .

*Proof of Theorem 10.* Starting with the right hand side, we have

$$\begin{aligned}
& 2\mathbf{E}_{c \sim U(0,1)}[\text{er}_D^{0-1,c}[\text{Thresh}_{D,f,c} \circ f]] \\
&= 2\mathbf{E}_{c \sim U(0,1)}[\text{er}_D^{0-1,c}[\text{sign} \circ (\hat{\eta} - c)]] \quad \text{(from Lemma 21)} \\
&= 2\mathbf{E}_{c \sim U(0,1)}[\mathbf{E}_s[(1-c)s\mathbf{1}(s \leq c) + c(1-s)\mathbf{1}(s > c)]] \quad \text{(from Lemma 20)} \\
&= 2\mathbf{E}_s[\mathbf{E}_{c \sim U(0,1)}[(1-c)s\mathbf{1}(s \leq c)] + \mathbf{E}_{c \sim U(0,1)}[c(1-s)\mathbf{1}(s > c)]] \\
&\quad \text{(exchanging expectations)} \\
&= 2\mathbf{E}_s\left[s \int_s^1 (1-c) dc + (1-s) \int_0^s c dc\right] \\
&= \mathbf{E}_s[s(1-s)^2 + (1-s)s^2] \\
&= \mathbf{E}_s[\mathbf{P}(y=1|s)(1-s)^2 + (1-\mathbf{P}(y=1|s))s^2] \quad \text{(since } \hat{\eta} \text{ is calibrated)} \\
&= \mathbf{E}_x[\eta(x)(1-\hat{\eta}(x))^2 + (1-\eta(x))\hat{\eta}(x)^2] \\
&\quad \text{(follows from } \mathbf{P}(y=1|s) = \mathbf{E}_x[\eta(x) \mid \hat{\eta}(x) = s]\text{)} \\
&= \text{er}_D^{\text{sq}}[\hat{\eta}].
\end{aligned}$$

□

## D Proof of Lemma 11

*Proof.* Expanding the left hand side, we have

$$\begin{aligned}
\text{regret}_D^{\text{sq}}[\hat{\eta}] &= \text{er}_D^{\text{sq}}[\hat{\eta}] - \text{er}_D^{\text{sq},*} = \text{er}_D^{\text{sq}}[\hat{\eta}] - \text{er}_D^{\text{sq}}[\eta] \\
&= 2\mathbf{E}_{c \sim U(0,1)} [\text{er}_D^{0-1,c} [\text{Thresh}_{D,\hat{\eta},c} \circ \hat{\eta}]] - 2\mathbf{E}_{c \sim U(0,1)} [\text{er}_D^{0-1,c} [\text{Thresh}_{D,\eta,c} \circ \eta]] \\
&\quad \text{(from Theorem 10)} \\
&= 2\mathbf{E}_{c \sim U(0,1)} [\text{er}_D^{0-1,c} [\text{Thresh}_{D,\hat{\eta},c} \circ \hat{\eta}]] - 2\mathbf{E}_{c \sim U(0,1)} [\text{er}_D^{0-1,c} [\text{sign} \circ (\eta - c)]] \\
&\quad \text{(from Lemma 21)} \\
&= 2\mathbf{E}_{c \sim U(0,1)} [\text{er}_D^{0-1,c} [\text{Thresh}_{D,\hat{\eta},c} \circ \hat{\eta}] - \text{er}_D^{0-1,c,*}] \\
&\leq \sqrt{8p(1-p)} \text{regret}_D^{\text{rank}}[\hat{\eta}] \quad \text{(from Theorem 4)}.
\end{aligned}$$

□

## E Proof of Lemma 13

We will find it useful to introduce a few notations. For a given ranking model  $f : X \rightarrow [a, b]$  and distribution  $D$  over  $X \times \{\pm 1\}$ , define  $\bar{\mu}_f(t) = \mathbf{P}(f(x) \leq t)$  and  $\bar{\eta}_f(t) = \mathbf{P}(y = 1, f(x) \leq t)$  for all  $t \in [a, b]$ ; as before,  $p = \mathbf{P}(y = 1)$ .

We first state a result of [27, 28] that characterizes the minimizer of (OP3).

**Theorem 22** ([27, 28]). *Let  $f : X \rightarrow [a, b]$  (where  $a, b \in \mathbb{R}$ ,  $a < b$ ) be any bounded-range ranking model and  $D$  be any probability distribution over  $X \times \{\pm 1\}$  such that  $(D, f)$  satisfies Assumption A. Moreover assume that  $\mu_f$  (see Assumption A), if mixed, does not have a point mass at the end-points  $a, b$ , and that the function  $\eta_f : [a, b] \rightarrow [0, 1]$  defined as  $\eta_f(t) = \mathbf{P}(y = 1 | f(x) = t)$  is square-integrable w.r.t. the density of the continuous part of  $\mu_f$ . Then the minimizer  $\text{Cal}_{D,f} : [a, b] \rightarrow [0, 1]$  of (OP3) exists, and  $\text{Cal}_{D,f}(\tau)$  for any  $\tau \in (a, b)$  is given by the right-continuous slope of the largest convex minorant<sup>5</sup> of following graph at  $t = \tau$ :*

$$G[f] = \{(\bar{\mu}_f(t), \bar{\eta}_f(t)) : t \in [a, b]\}. \quad (5)$$

Moreover,  $G[\text{Cal}_{D,f} \circ f]$  is piece-wise linear on all portions where it disagrees with  $G[f]$ ; in particular, there exists a collection of disjoint open intervals  $\{(a_\alpha, b_\alpha) \mid \alpha \in \Lambda\}$  in  $[a, b]$ , where  $\Lambda$  is some index set, such that  $\text{Cal}_{D,f}$  evaluates to a constant on each such interval (with the constant being distinct for each interval) and  $\text{Cal}_{D,f}$  is equal to  $\eta_f$  everywhere else in  $[a, b]$ :

$$\text{Cal}_{D,f}(t) = \begin{cases} \nu_\alpha & \text{if } t \in (a_\alpha, b_\alpha), \text{ for some } \alpha \in \Lambda \\ \eta_f(t) & \text{otherwise} \end{cases},$$

where

$$\nu_\alpha = \frac{\bar{\eta}_f(b_\alpha) - \bar{\eta}_f(a_\alpha)}{\bar{\mu}_f(b_\alpha) - \bar{\mu}_f(a_\alpha)}, \quad (6)$$

with  $\nu_\alpha \neq \nu_{\alpha'}$  for any  $\alpha \neq \alpha'$ ,  $\alpha, \alpha' \in \Lambda$ .

While the proof for the above result in [27, 28] assumes a continuous and strictly positive density  $\mu_f$  over  $[a, b]$ , it can be extended to handle the slightly more general conditions considered here.

We are now ready to prove the two properties stated for  $\text{Cal}_{D,f}$  in Lemma 13.

*Proof of Lemma 13.* We shall assume that the score distribution of  $f$  over  $[a, b]$  is continuous, and  $\mu_f$  denotes the corresponding probability density function; a similar proof can be shown when the score distribution is discrete or is mixed and satisfies conditions stated in the Lemma. For simplicity of notation, let us denote  $\text{Cal}_{D,f}$  as  $\text{Cal}$ .

*Proof of (1):* We need to show that for any  $u \in \text{range}(\text{Cal} \circ f)$ ,  $\mathbf{P}(y = 1 \mid \text{Cal}(f(x)) = u) = u$ . There are three possible cases that we could consider: (i)  $u = \nu_\alpha$ , for some unique  $\alpha \in \Lambda$  (see

<sup>5</sup>A real-valued function  $g_1$  is a minorant of another real-valued function  $g_2$  defined over the same domain, if  $g_1(z) \leq g_2(z)$ ,  $\forall z$ ; similarly,  $g_1$  is a majorant of  $g_2$ , if  $g_1(z) \geq g_2(z)$ ,  $\forall z$ .

Eq. (6)), with  $\text{Cal}(t) = u, \forall t \in (a_\alpha, b_\alpha)$ , and  $\text{Cal}(t) \neq u$ , for all  $t \notin (a_\alpha, b_\alpha)$ ; (ii)  $u \neq \nu_\alpha$ , for any  $\alpha \in \Lambda$ ; (iii)  $u = \nu_\alpha$  for some unique  $\alpha \in \Lambda$ , and there exists  $t \notin \cup_{\alpha \in \Lambda} (a_\alpha, b_\alpha)$  with  $\text{Cal}(t) = u$ .

For any  $u \in \text{range}(\text{Cal} \circ f)$  satisfying case (i), there exists  $\alpha \in \Lambda$  s.t.  $\nu_\alpha = u$ . We have from Eq. (6),

$$\begin{aligned} u &= \frac{\bar{\eta}_f(b_\alpha) - \bar{\eta}_f(a_\alpha)}{\bar{\mu}_f(b_\alpha) - \bar{\mu}_f(a_\alpha)} \\ &= \frac{\int_{a_\alpha}^{b_\alpha} \eta_f(s) \mu_f(s) ds}{\int_{a_\alpha}^{b_\alpha} \mu_f(s) ds} \\ &= \mathbf{P}(y = 1 \mid f(x) \in (a_\alpha, b_\alpha)) \\ &= \mathbf{P}(y = 1 \mid \text{Cal}(f(x)) = u). \end{aligned}$$

The last step follows from the fact that for all  $t \notin (a_\alpha, b_\alpha)$ ,  $\text{Cal}(t) \neq u$ .

For any  $u \in \text{range}(\text{Cal} \circ f)$  satisfying case (ii), there exists no  $\alpha \in \Lambda$  with  $\nu_\alpha = u$ ; we thus have from Theorem 22 that  $\eta_f(t) = u$  for all  $t$  with  $\text{Cal}(t) = u$ . Then

$$\begin{aligned} \mathbf{P}(y = 1 \mid \text{Cal}(f(x)) = u) &= \frac{\int_{\{s : \text{Cal}(s)=u\}} \eta_f(s) \mu_f(s) ds}{\int_{\{s : \text{Cal}(s)=u\}} \mu_f(s) ds} \\ &= \frac{\int_{\{s : \text{Cal}(s)=u\}} u \mu_f(s) ds}{\int_{\{s : \text{Cal}(s)=u\}} \mu_f(s) ds} \\ &= u. \end{aligned}$$

For any  $u \in \text{range}(\text{Cal} \circ f)$  satisfying case (iii), there exists a unique  $\alpha \in \Lambda$  for which  $\nu_\alpha = u$ , with  $\text{Cal}(t) = u, \forall t \in (a_\alpha, b_\alpha)$ , and there also exists  $t \notin \cup_{\alpha \in \Lambda} (a_\alpha, b_\alpha)$ , for which  $\text{Cal}(t) = \eta_f(t) = u$ .

$$\begin{aligned} \mathbf{P}(y = 1 \mid \text{Cal}(f(x)) = u) &= \frac{\int_{\{s : \text{Cal}(s)=u\}} \eta_f(s) \mu_f(s) ds}{\int_{\{s : \text{Cal}(s)=u\}} \mu_f(s) ds} \\ &= \frac{\int_{a_\alpha}^{b_\alpha} \eta_f(s) \mu_f(s) ds + \int_{\{s : \text{Cal}(s)=\eta_f(s)=u\}} \eta_f(s) \mu_f(s) ds}{\int_{\{s : \text{Cal}(s)=u\}} \mu_f(s) ds} \\ &= \frac{u \int_{a_\alpha}^{b_\alpha} \mu_f(s) ds + u \int_{\{s : \text{Cal}(s)=\eta_f(s)=u\}} \mu_f(s) ds}{\int_{\{s : \text{Cal}(s)=u\}} \mu_f(s) ds} \\ &\quad \text{(applying Eq. (6) to the first integral in the numerator)} \\ &= u. \end{aligned}$$

*Proof of (2):* Recall that for a ranking model  $f$ ,  $\text{er}_D^{\text{rank}}[f]$  is equivalent to one minus the area under the ROC curve<sup>6</sup> (AUC) of  $f$ . It is thus enough to show that the ROC curve of  $\text{Cal} \circ f$  is a majorant for the ROC curve of  $f$ . The ROC curve for  $f$  can be defined as

$$\begin{aligned} \text{ROC}[f] &= \left\{ \left( \mathbf{P}(f(x) \leq t \mid y = -1), \mathbf{P}(f(x) > t \mid y = 1) \right) : t \in [a, b] \right\} \\ &= \left\{ \left( \frac{1}{1-p} \int_a^t (1 - \eta_f(s)) \mu_f(s) ds, \frac{1}{p} \int_t^b \eta_f(s) \mu_f(s) ds \right) : t \in [a, b] \right\}. \end{aligned} \quad (7)$$

As illustrated in Figure 4, each point in the graph  $G[f]$  (defined in Eq. (5)) has a corresponding point in  $\text{ROC}[f]$ ; similarly, each line segment in  $G[f]$  corresponds to a line segment in  $\text{ROC}[f]$ . Moreover, for any two given ranking models  $f_1$  and  $f_2$ , if a line segment in  $G[f_1]$  is a minorant for a certain portion of  $G[f_2]$ , the corresponding line segment in  $\text{ROC}[f_1]$  is a majorant for the corresponding portion of  $\text{ROC}[f_2]$  (see segments AB and A'B' in Figure 4). Since, from Theorem 22, we have that  $G[\text{Cal} \circ f]$  is a minorant for  $G[f]$ , and  $G[\text{Cal} \circ f]$  is piece-wise linear on all portions where it disagrees with  $G[f]$ , it follows that  $\text{ROC}[\text{Cal} \circ f]$  is a majorant for  $\text{ROC}[f]$ .  $\square$

<sup>6</sup>The ROC curve of a ranking model  $f$  is the plot of the true positive rate (probability of classifying a random positive example as positive) against the false positive rate (probability of classifying a random negative example as positive) of a classifier of the form  $\text{sign} \circ (f - t)$  for all thresholds  $t \in [a, b]$ .

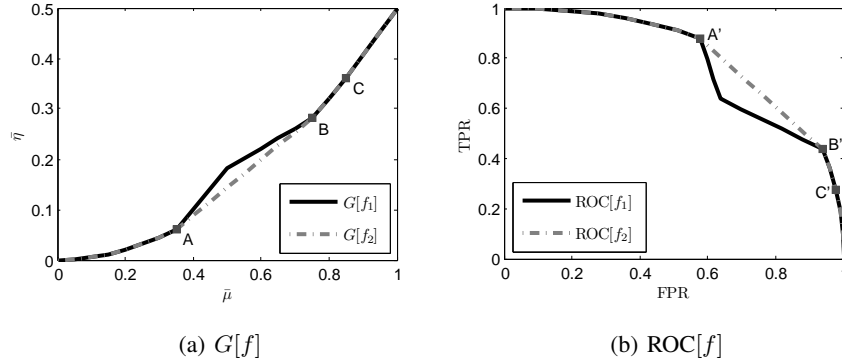

Figure 4: Sample plots illustrating the relationship between the graph  $G$  (plot of  $\bar{\eta}_f(t)$  against  $\bar{\mu}_f(t)$  for all  $t \in [a, b]$ ; see Eq. (5)) and the ROC curve (plot of true positive rate  $\text{TPR}_f(t) = \mathbf{P}(f(x) > t \mid y = 1)$  against false positive rate  $\text{FPR}_f(t) = \mathbf{P}(f(x) \leq t \mid y = -1)$  for all  $t \in [a, b]$ ; see Eq. (7)). (a) Graph  $G$  for ranking models  $f_1$  and  $f_2$ : the graphs for  $f_1$  and  $f_2$  agree on all points except for the portion between points  $A$  and  $B$ , where the line segment  $AB$  in  $G[f_2]$  is a minorant for  $G[f_1]$ . (b) ROC curve for the ranking models  $f_1$  and  $f_2$ : the points  $A, B$  and  $C$  in the graph  $G$  for  $f_1$  and  $f_2$  correspond to points  $A', B'$  and  $C'$  respectively in the ROC curves for  $f_1$  and  $f_2$ ; the line segment  $AB$  in  $G[f_2]$  corresponds to the line segment  $A'B'$  in  $\text{ROC}[f_2]$ , which is a majorant for the corresponding portion in  $\text{ROC}[f_1]$ . Moreover, while  $G[f_2]$  is a convex minorant for  $G[f_1]$ , the corresponding ROC curve  $\text{ROC}[f_2]$  is a concave majorant for  $\text{ROC}[f_1]$ .

## F Proof of Theorem 14

*Proof.* Using the fact that  $\text{Cal}_{D,f} \circ f$  is calibrated (property 1 in Lemma 13), we have

$$\begin{aligned} \text{regret}_D^{\text{sq}}[\text{Cal} \circ f] &\leq \sqrt{8p(1-p)} \text{regret}_D^{\text{rank}}[\text{Cal}_{D,f} \circ f] \quad (\text{from Lemma 11}) \\ &\leq \sqrt{8p(1-p)} \text{regret}_D^{\text{rank}}[f] \quad (\text{from property 2 in Lemma 13}). \end{aligned}$$

□

## G Proof of Theorem 16

*Proof.*

$$\begin{aligned} \text{regret}_D^{\text{sq}}[\widehat{\text{Cal}}_{S,f} \circ f] &= \text{er}_D^{\text{sq}}[\widehat{\text{Cal}}_{S,f} \circ f] - \text{er}_D^{\text{sq}}[\eta] \\ &= \text{er}_D^{\text{sq}}[\widehat{\text{Cal}}_{S,f} \circ f] - \text{er}_D^{\text{sq}}[\text{Cal}_{D,f} \circ f] + \text{er}_D^{\text{sq}}[\text{Cal}_{D,f} \circ f] - \text{er}_D^{\text{sq}}[\eta] \\ &= \left( \text{er}_D^{\text{sq}}[\widehat{\text{Cal}}_{S,f} \circ f] - \text{er}_D^{\text{sq}}[\text{Cal}_{D,f} \circ f] \right) + \text{regret}_D^{\text{sq}}[\text{Cal}_{D,f} \circ f] \quad (8) \end{aligned}$$

Using Theorem 14, the second term in the above expression can be upper bounded in terms of the ranking regret of  $f$ . We now focus on upper bounding the first term. As in the proof of Theorem 6, consider the distribution  $D_f$  induced by  $f$  over  $\mathbb{R} \times \{\pm 1\}$  and let  $S_f$  be the set obtained by applying  $f$  to each instance in  $S$ ; clearly,  $S_f$  is iid drawn from  $D_f$ . One can then view the optimization problem in OP4 as empirical risk minimization over  $\mathcal{G}_{\text{inc}}$  w.r.t. the sample  $S_f$ . Using standard Rademacher averages based uniform convergence result for empirical risk minimization over a real-valued function class with the squared loss, we have that the following holds with probability at least  $1 - \delta$  (over the draw of  $S \sim D^n$ ):

$$\text{er}_D^{\text{sq}}[\widehat{\text{Cal}}_{S,f} \circ f] - \inf_{g \in \mathcal{G}_{\text{inc}}} \text{er}_D^{\text{sq}}[g \circ f] \leq 4R_{S_f}(\mathcal{G}_{\text{inc}}) + 2\sqrt{\frac{2 \ln(\frac{8}{\delta})}{n}},$$

where  $R_{S_f}(\mathcal{G}_{\text{inc}})$  is the empirical Rademacher average of  $\mathcal{G}_{\text{inc}}$  w.r.t.  $S_f$ . Using Dudley's integral, and bounds on covering numbers of  $\mathcal{G}_{\text{inc}}$ , one can show  $R_{S_f}(\mathcal{G}_{\text{inc}}) \leq 24\sqrt{\frac{2 \ln(n)}{n}}$  (see for example [21]);

we thus have with probability at least  $1 - \delta$  (over the draw of  $S \sim D^n$ ),

$$\text{er}_D^{\text{sq}}[\widehat{\text{Cal}}_{S,f} \circ f] - \inf_{g \in \mathcal{G}_{\text{inc}}} \text{er}_D^{\text{sq}}[g \circ f] \leq 96 \sqrt{\frac{2 \ln(n)}{n}} + 2 \sqrt{\frac{2 \ln(\frac{8}{\delta})}{n}}.$$

Plugging this into Eq. (8) (along with the upper bound on the second term) completes the proof.  $\square$
